# Supplementary material for: Intraspecies Competition for Niches in the Distal Gut Dictate Transmission during Persistent Salmonella Infection
Source: PLoS Pathog. 2014 Dec 4;10(12):e1004527. doi: 10.1371/journal.ppat.1004527 (PMC4256465; doi:10.1371/journal.ppat.1004527)
Supplement: Table S3 — Total burden of Salmonella within intestinal tissues in the co-infection model. Mice were co-infected with SL1344 and SL1344-kanR, one strain orally and the other by IP injection. Mice were sacrificed after 30 days of infection, and CFU per gram tissue of the oral strain was converted into total CFU within the entire small intestine, cecum, or colon. (XLSX) [file ppat.1004527.s016.xlsx]

## Sheet: Sheet1
Table S3: Total burden of Salmonella within intestinal tissues in the co-infection model
	Low shedders	Moderate shedders	Super shedders
	(n=10)	(n=14)	(n=13)
CFU in small intestine
mean	6.78 x 102	3.33 x 104	6.15 x 105
range	0 - 1.93 x 103	4.00 x 101 - 2.56 x 105	3.65 x 101 - 4.70 x 106
CFU in cecum
mean	2.22 x 104	1.62 x 106	4.16 x 107
range	4.42 x 101 - 6.90 x 104	7.00 x 103 - 1.55 x 107	2.15 x 103 - 3.69 x 108
CFU in colon
mean	3.26 x 103	1.99 x 105	3.59 x 107
range	1.00x 101 - 6.67 x 103	2.10 x 103 - 4.00 x 105	1.59 x 104 - 1.10 x 108
